# Supplementary material for: Does Production of Clarias gariepinus × Heterobranchus longifilis Hybrids Influence Quality Attributes of Fillets?
Source: MDPI journal article supplement (doi:10.3390/foods11142074), 2022-07-12
Supplement: s1 [file s1]

**Table S1.** Fatty acid composition (% of FA in fat) of *C. gariepinus* and heteroclarias fat. Values are expressed as mean  $\pm$  standard deviation (SD).

|                                                          | <i>C.gariepinus</i> |                   | Heteroclarias     |                   |
|----------------------------------------------------------|---------------------|-------------------|-------------------|-------------------|
|                                                          | Male                | Female            | Male              | Female            |
| (C12:0) Lauric acid                                      | 0.08 $\pm$ 0.01     | 0.10 $\pm$ 0.0001 | 0.09 $\pm$ 0.0001 | 0.07 $\pm$ 0.0    |
| (C14:0) Myristic acid                                    | 0.94 $\pm$ 0.02     | 1.09 $\pm$ 0.02   | 1.06 $\pm$ 0.01   | 1.12 $\pm$ 0.01   |
| (C15:0) Pentadecanoic acid                               | 0.16 $\pm$ 0.004    | 0.17 $\pm$ 0.01   | 0.15 $\pm$ 0.01   | 0.15 $\pm$ 0.01   |
| (C16:0) Palmitic acid                                    | 15.25 $\pm$ 0.05    | 15.33 $\pm$ 0.07  | 17.22 $\pm$ 0.05  | 18.37 $\pm$ 0.04  |
| (C16:1n7) Palmitoleic acid                               | 1.85 $\pm$ 0.02     | 2.09 $\pm$ 0.01   | 2.00 $\pm$ 0.01   | 2.01 $\pm$ 0.01   |
| (C17:0) Heptadecanoic acid                               | 0.24 $\pm$ 0.01     | 0.24 $\pm$ 0.01   | 0.21 $\pm$ 0.0001 | 0.21 $\pm$ 0.01   |
| (C17:1n7) cis-10-Heptadecenoic acid                      | < LOD               | 0.05 $\pm$ 0.0001 | 0.05 $\pm$ 0.01   | < LOD             |
| (C18:0) Stearic acid                                     | 4.46 $\pm$ 0.02     | 4.44 $\pm$ 0.01   | 5.19 $\pm$ 0.01   | 6.17 $\pm$ 0.0001 |
| (C18:1n9c + C18:1n9t) Oleic acid + Elaidic acid          | 45.66 $\pm$ 0.13    | 46.20 $\pm$ 0.02  | 43.44 $\pm$ 0.06  | 44.62 $\pm$ 0.03  |
| (C18:2n6c) Linoleic acid                                 | 17.70 $\pm$ 0.10    | 17.01 $\pm$ 0.02  | 17.19 $\pm$ 0.06  | 15.09 $\pm$ 0.02  |
| (C18:2n6t) Linolelaidic acid                             | < LOD               | < LOD             | < LOD             | 0.06 $\pm$ 0.01   |
| (C18:3n6) gamma-Linolenic acid [GLA]                     | 1.37 $\pm$ 0.01     | 1.73 $\pm$ 0.01   | 0.94 $\pm$ 0.0001 | 0.73 $\pm$ 0.01   |
| (C18:3n3) alfa- Linolenic acid [ALA]                     | 3.39 $\pm$ 0.03     | 3.39 $\pm$ 0.0001 | 3.60 $\pm$ 0.01   | 3.51 $\pm$ 0.01   |
| (C20:0) Arachidic acid                                   | 0.41 $\pm$ 0.01     | 0.38 $\pm$ 0.01   | 0.36 $\pm$ 0.01   | 0.34 $\pm$ 0.0001 |
| (C20:1n15) cis-5- Eicosenoic acid                        | 0.17 $\pm$ 0.01     | 0.18 $\pm$ 0.01   | 0.15 $\pm$ 0.01   | 0.13 $\pm$ 0.01   |
| (C20:1n9) cis-11-Eicosenoic acid                         | 1.78 $\pm$ 0.03     | 1.81 $\pm$ 0.01   | 1.71 $\pm$ 0.0001 | 1.72 $\pm$ 0.01   |
| (C20:2n6) cis-11.14-Eicosenoic acid                      | 0.50 $\pm$ 0.01     | 0.50 $\pm$ 0.01   | 0.52 $\pm$ 0.01   | 0.53 $\pm$ 0.01   |
| (C20:3n6) cis-8.11.14-Eicosatrienoic acid [DGLA]         | 0.89 $\pm$ 0.0041   | 0.77 $\pm$ 0.0001 | 0.82 $\pm$ 0.0001 | 0.74 $\pm$ 0.0001 |
| (C20:4n6) Arachidonic acid [AA]                          | 0.62 $\pm$ 0.0041   | 0.55 $\pm$ 0.0001 | 0.64 $\pm$ 0.01   | 0.57 $\pm$ 0.0001 |
| (C20:3n3) cis-11.14.17-Eicosatrienoic acid[ETE]          | 0.14 $\pm$ 0.01     | 0.13 $\pm$ 0.01   | 0.16 $\pm$ 0.01   | 0.14 $\pm$ 0.01   |
| (C20:5n3) cis-5.8.11.14.17-Eicosapentaenoic acid [EPA]   | 0.68 $\pm$ 0.004    | 0.72 $\pm$ 0.01   | 0.74 $\pm$ 0.01   | 0.73 $\pm$ 0.0001 |
| (C22:0) Behenic acid                                     | 0.24 $\pm$ 0.01     | 0.22 $\pm$ 0.01   | 0.19 $\pm$ 0.0001 | 0.17 $\pm$ 0.01   |
| (C22:1n9) Erucic acid                                    | 0.20 $\pm$ 0.0001   | 0.23 $\pm$ 0.10   | 0.17 $\pm$ 0.01   | 0.18 $\pm$ 0.0001 |
| (C22:2n6) cis-13.16-Docosadienoic acid                   | < LOD               | < LOD             | 0.13 $\pm$ 0.03   | 0.05 $\pm$ 0.03   |
| (C24:0) Lignoceric acid                                  | 0.10 $\pm$ 0.01     | 0.09 $\pm$ 0.0001 | 0.008 $\pm$ 0.01  | 0.08 $\pm$ 0.0001 |
| (C22:6n3) cis-4.7.10.13.16.19-Docosahexaenoic acid [DHA] | 2.86 $\pm$ 0.04     | 2.26 $\pm$ 0.03   | 2.90 $\pm$ 0.01   | 2.23 $\pm$ 0.01   |
| (C24:1n9) Nervonic acid                                  | 0.17 $\pm$ 0.01     | 0.17 $\pm$ 0.01   | 0.15 $\pm$ 0.01   | 0.14 $\pm$ 0.01   |

LOD – level of detection.
